# Supplementary material for: The Applicability of 2-amino-4,6-diphenyl-pyridine-3-carbonitrile Sensors for Monitoring Different Types of Photopolymerization Processes and Acceleration of Cationic and Free-Radical Photopolymerization Under Near UV Light
Source: MDPI journal article supplement (doi:10.3390/s19071668), 2019-04-08
Supplement: s1 [file s1]

## *Supplementary material*

### **The applicability of 2-amino-4,6-diphenyl-pyridine-3-carbonitrile sensors for monitoring different types of photopolymerization processes and acceleration of cationic and free-radical photopolymerization under near UV light**

**Joanna Ortyl<sup>1,2\*</sup>, Paweł Fiedor<sup>1</sup>, Anna Chachaj-Brekiesz<sup>3</sup>, Maciej Pilch<sup>1</sup>, Emilia Hola<sup>1</sup>,  
Mariusz Galek<sup>2</sup>**

<sup>1</sup> Cracow University of Technology, Faculty of Chemical Engineering and Technology,  
Warszawska 24, 31-155 Kraków, Poland

<sup>2</sup> Photo HiTech Ltd., Bobrzyńskiego 14, 30-348 Kraków, Poland

<sup>3</sup> Jagiellonian University, Faculty of Chemistry, Gronostajowa 2, 30-387 Kraków, Poland

#### **Table of contents:**

|                                                                                                              |           |
|--------------------------------------------------------------------------------------------------------------|-----------|
| <b>1. Preparation and characterization of 2-amino-4,6-diphenyl-pyridine-3-carbonitrile derivatives .....</b> | <b>S2</b> |
| <b>1.1. Materials and methods .....</b>                                                                      | <b>S2</b> |
| <b>1.2. Synthesis of 2-benzylidenepropanedinitrile derivatives .....</b>                                     | <b>S2</b> |
| <b>1.3. Synthesis of 2-amino-4,6-diphenylpyridine-3-carbonitrile derivatives .....</b>                       | <b>S3</b> |
| <b>2. NMR spectra of 2-amino-4,6-diphenylpyridine-3-carbonitrile derivatives .....</b>                       | <b>S5</b> |
| <b>3. Materials for photopolymerization processes .....</b>                                                  | <b>S8</b> |
| <b>4. References .....</b>                                                                                   | <b>S8</b> |

---

\*Corresponding author:  
e-mail: jortyl@chemia.pk.edu.pl (Joanna Ortyl)

## 1. Preparation and characterization of 2-amino-4,6-diphenyl-pyridine-3-carbonitrile derivatives

Derivatives of 2-amino-4,6-diphenylpyridine-3-carbonitrile were synthesized by modified protocol by Kambe et al. [48]. This procedure involved condensation reaction between earlier synthesized 2-benzylidenepropanedinitrile derivative and commercially available acetophenone.

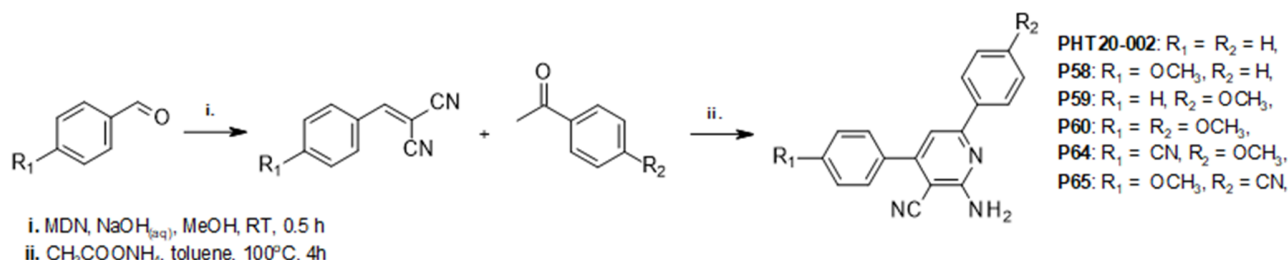

### 1.1. Materials and methods

Reagents for synthesis were purchased from Sigma-Aldrich or Alfa Aesar and used without further purification.

Structure and purity of obtained products were confirmed by NMR and LC-MS analysis. <sup>1</sup>H NMR spectra were recorded in DMSO-D<sub>6</sub> on Avance III HD 400 MHz (Bruker) spectrometer. Chemical shifts are reported in parts per million (δ) and referenced to residual protonated solvent peak (δ = 2.50 ppm). LC-MS analyses were obtained on Shimadzu LCMS-2020 with ESI ionization method. Acetonitrile was used as eluent.

### 1.2. Synthesis of 2-benzylidenepropanedinitrile derivatives

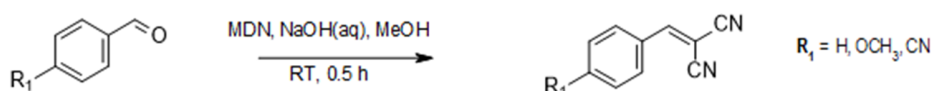

The solution of sodium hydroxide (0.5 mmol, 20 mg) in water (5.0 cm<sup>3</sup>) was added dropwise to mixed solution of appropriate benzaldehyde derivative (10.0 mmol) and malononitrile (12.0 mmol, 793 mg) in methanol (30.0 cm<sup>3</sup>). After 30 minutes of stirring the resulting crystal-like precipitate was filtered under reduced pressure and dried under vacuum.

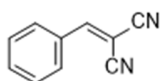

#### 2-benzylidenepropanedinitrile,

10.00 g, yield: 65%,

<sup>1</sup>H NMR (400 MHz, DMSO) δ 8.56 (s, 1H), 7.99 – 7.92 (m, 2H),  
7.73 – 7.66 (m, 1H), 7.66 – 7.59 (m, 2H).

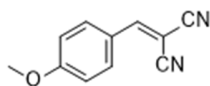

**2-[(4-methoxyphenyl)methylene]propanedinitrile,**

15.76 g, yield: 86%,  
<sup>1</sup>H NMR (400 MHz, DMSO) δ 8.39 (s, 1H), 8.00 – 7.94 (m, 2H),  
 7.22 – 7.15 (m, 2H), 3.88 (s, 3H).

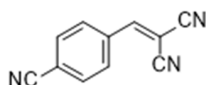

**2-[(4-cyanophenyl)methylene]propanedinitrile,**

16.10 g, yield: 90%,  
<sup>1</sup>H NMR (400 MHz, DMSO) δ 8.65 (s, 1H), 8.12 – 8.07 (m, 2H),  
 8.07 – 8.02 (m, 2H).

**1.3. Synthesis of 2-amino-4,6-diphenylpyridine-3-carbonitrile derivatives**

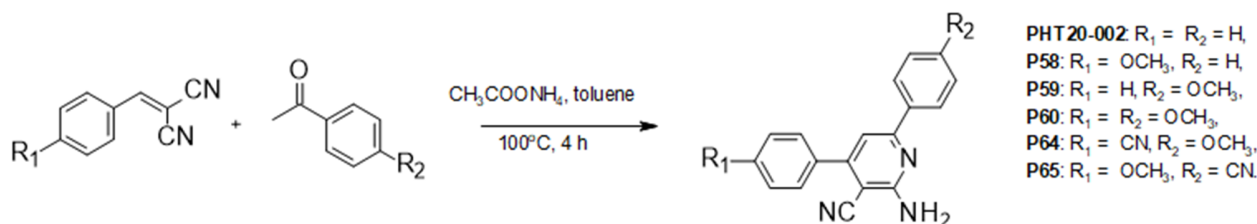

Ammonium acetate (7.10 mmol, 547 mg) was added to mixed solution of appropriate derivatives of acetophenone (6.50 mmol) and 2-benzylidenepropanedinitrile (6.50 mmol) in toluene (10.0 cm<sup>3</sup>). Resulting mixture was heated for 4 hours in temperature 100°C. Obtained solution was washed with water and saline, dried over anhydrous magnesium sulphate and concentrated under reduced pressure. Product with satisfying purity was obtained after crystallization from methanol.

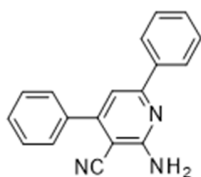

**2-amino-4,6-diphenylpyridine-3-carbonitrile (PHT20-002);**

0.698 g Yield: 33%;  
 purity (LC): >99%;  
<sup>1</sup>H NMR (400 MHz, DMSO) δ 8.17 – 8.10 (m, 2H), 7.72 – 7.65 (m,  
 2H), 7.60 – 7.53 (m, 3H), 7.52 – 7.46 (m, 3H), 7.28 (s, 1H), 7.02  
 (brs, 2H);  
 MS (ESI) m/z(%): 272 ([M+H]<sup>+</sup>, 28%), 313 ([M+CH<sub>3</sub>CN]<sup>+</sup>, 100%).

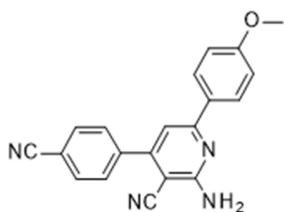

**2-amino-4-(4-cyanophenyl)-6-(4-methoxyphenyl)pyridine-3-carbonitrile (P64);**

0.730 g, yield: 30%;  
 purity (LC): 95%;  
<sup>1</sup>H NMR (400 MHz, DMSO) δ 8.15 – 8.09 (m, 2H), 8.07 – 8.01 (m,  
 2H), 7.90 – 7.84 (m, 2H), 7.27 (s, 1H), 7.09 – 7.01 (m, 4H), 3.82  
 (s, 3H);  
 MS (ESI) m/z(%): 327 ([M+H]<sup>+</sup>, 19%), 368 ([M+CH<sub>3</sub>CN]<sup>+</sup>, 100%).

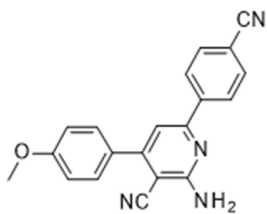

**2-amino-6-(4-cyanophenyl)-4-(4-methoxyphenyl)pyridine-3-carbonitrile (P65);**

0.370 g, yield: 15%;

purity (LC): 94%;

<sup>1</sup>H NMR (400 MHz, DMSO) δ 8.34 – 8.28 (m, 2H), 8.00 – 7.93 (m, 2H), 7.71 – 7.65 (m, 2H), 7.38 (s, 1H), 7.14 – 7.10 (m, 2H), 7.08 (brs, 2H), 3.84 (s, 3H);

MS (ESI) m/z(%): 327 ([M+H]<sup>+</sup>, 10%), 368 ([M+CH<sub>3</sub>CN]<sup>+</sup>, 100%)

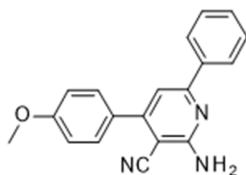

**2-amino-4-(4-methoxyphenyl)-6-phenylpyridine-3-carbonitrile (P58);**

0.630 g, yield: 27%;

purity (LC): >99%;

<sup>1</sup>H NMR (400 MHz, DMSO) δ 8.15 – 8.09 (m, 2H), 7.70 – 7.63 (m, 2H), 7.53 – 7.44 (m, 3H), 7.25 (s, 1H), 7.14 – 7.08 (m, 2H), 6.95 (brs, 2H), 3.84 (s, 3H);

MS (ESI) m/z(%): 302 ([M+H]<sup>+</sup>, 64%), 343 ([M+CH<sub>3</sub>CN]<sup>+</sup>, 100%).

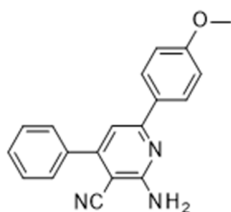

**2-amino-6-(4-methoxyphenyl)-4-phenylpyridine-3-carbonitrile (P59);**

0.790 g, yield: 34%;

purity (LC): >99%;

<sup>1</sup>H NMR (400 MHz, DMSO) δ 8.15 – 8.08 (m, 2H), 7.70 – 7.63 (m, 2H), 7.58 – 7.50 (m, 3H), 7.22 (s, 1H), 7.07 – 7.00 (m, 2H), 6.94 (brs, 2H), 3.82 (s, 3H);

MS (ESI) m/z(%): 302 ([M+H]<sup>+</sup>, 62%), 343 ([M+CH<sub>3</sub>CN]<sup>+</sup>, 100%).

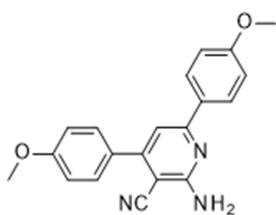

**2-amino-4,6-bis(4-methoxyphenyl)pyridine-3-carbonitrile (P60);**

0.800 g, yield: 32%;

purity (LC): >99%;

<sup>1</sup>H NMR (400 MHz, DMSO) δ 8.14 – 8.06 (m, 2H), 7.68 – 7.61 (m, 2H), 7.19 (s, 1H), 7.14 – 7.07 (m, 2H), 7.06 – 7.00 (m, 2H), 6.87 (brs, 2H), 3.84 (s, 3H), 3.82 (s, 3H);

MS (ESI) m/z(%): 332 ([M+H]<sup>+</sup>, 74%), 373 ([M+CH<sub>3</sub>CN]<sup>+</sup>, 100%).

## 2. <sup>1</sup>H NMR spectra of 2-amino-4,6-diphenylpyridine-3-carbonitrile derivatives

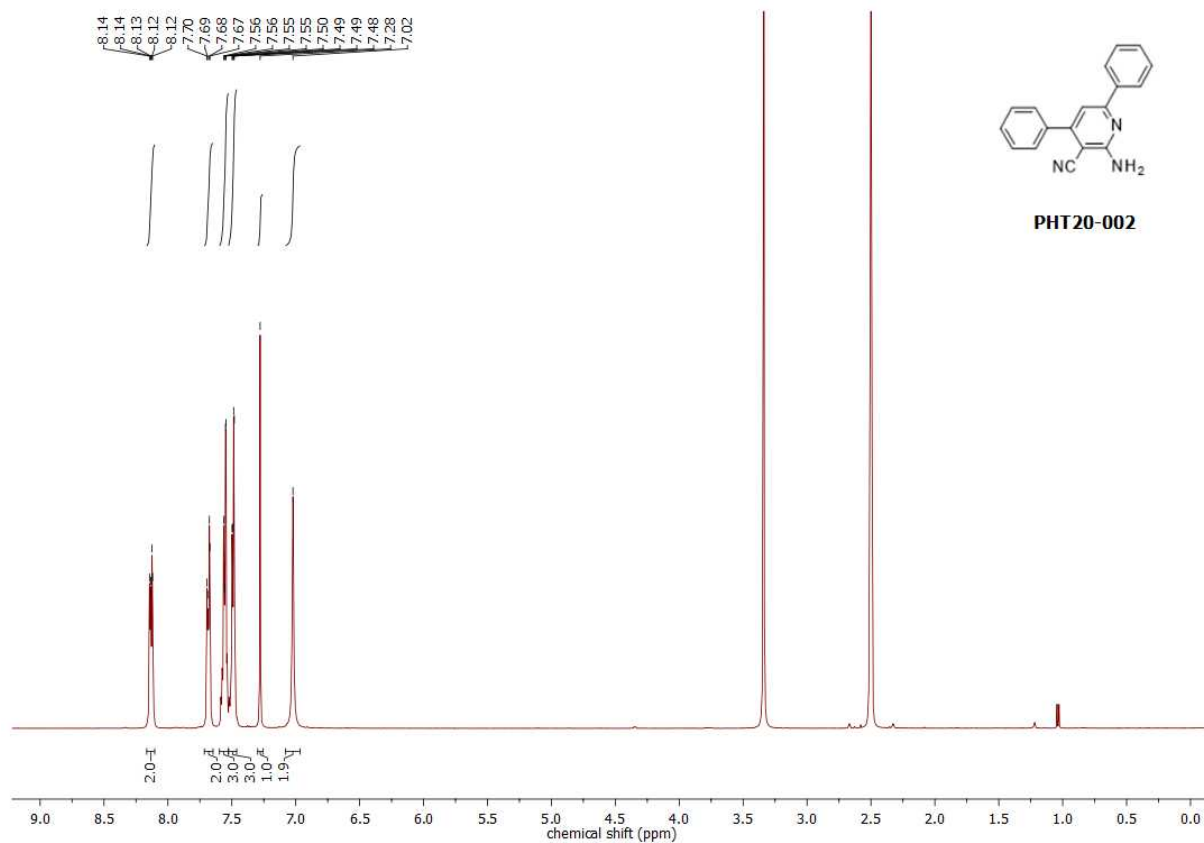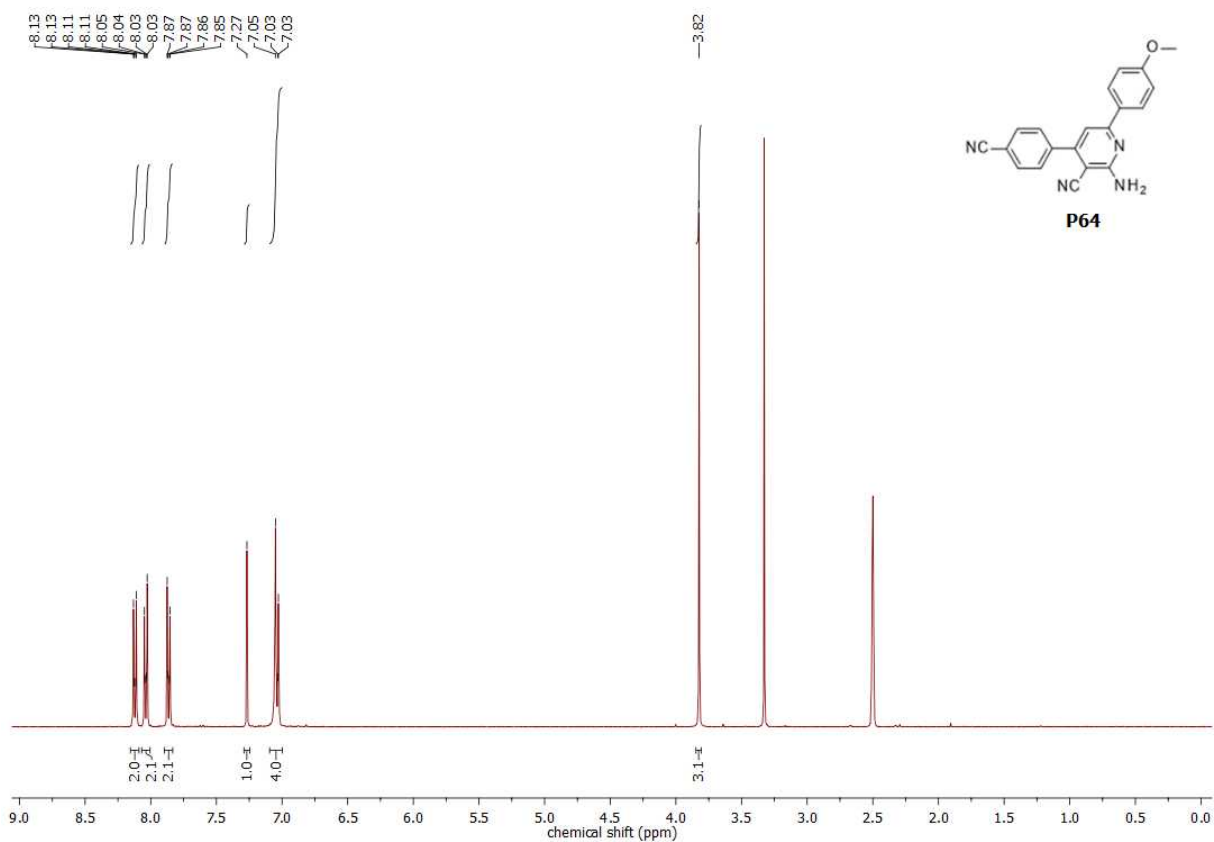

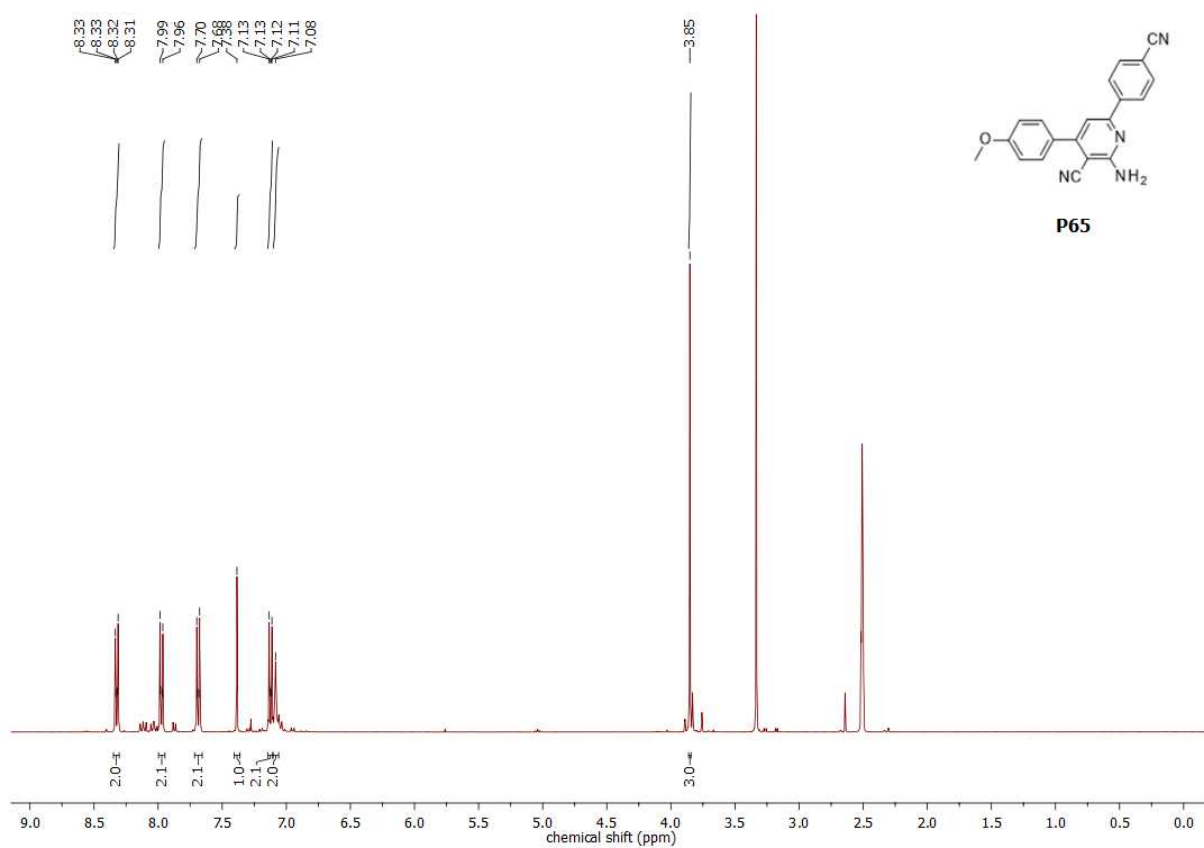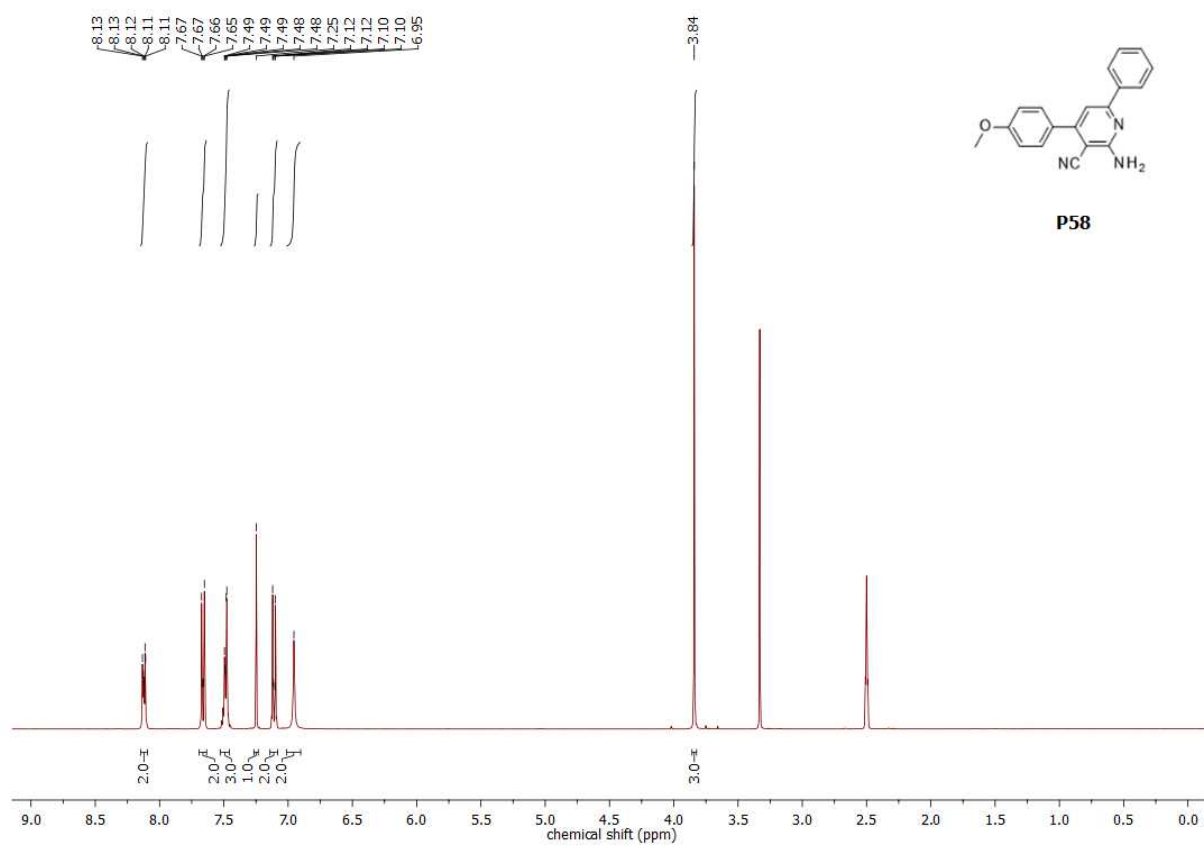

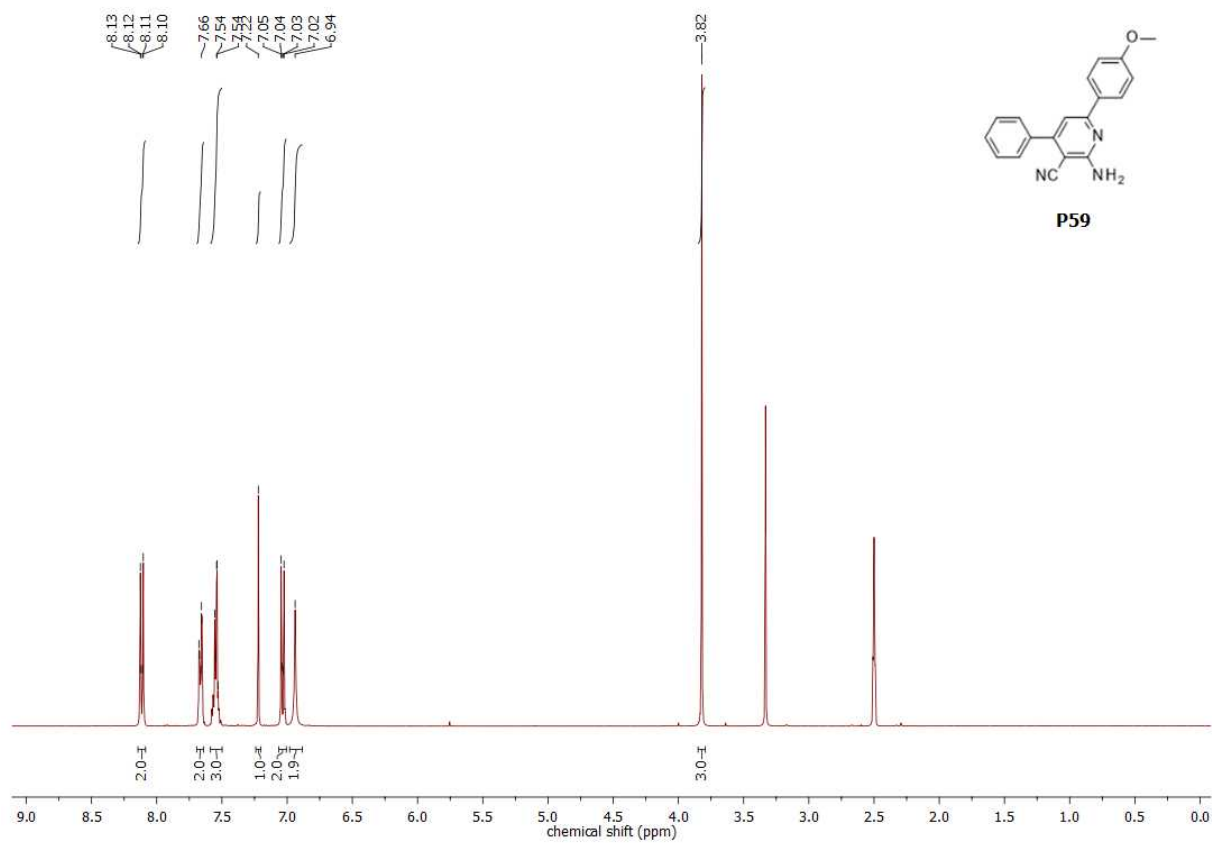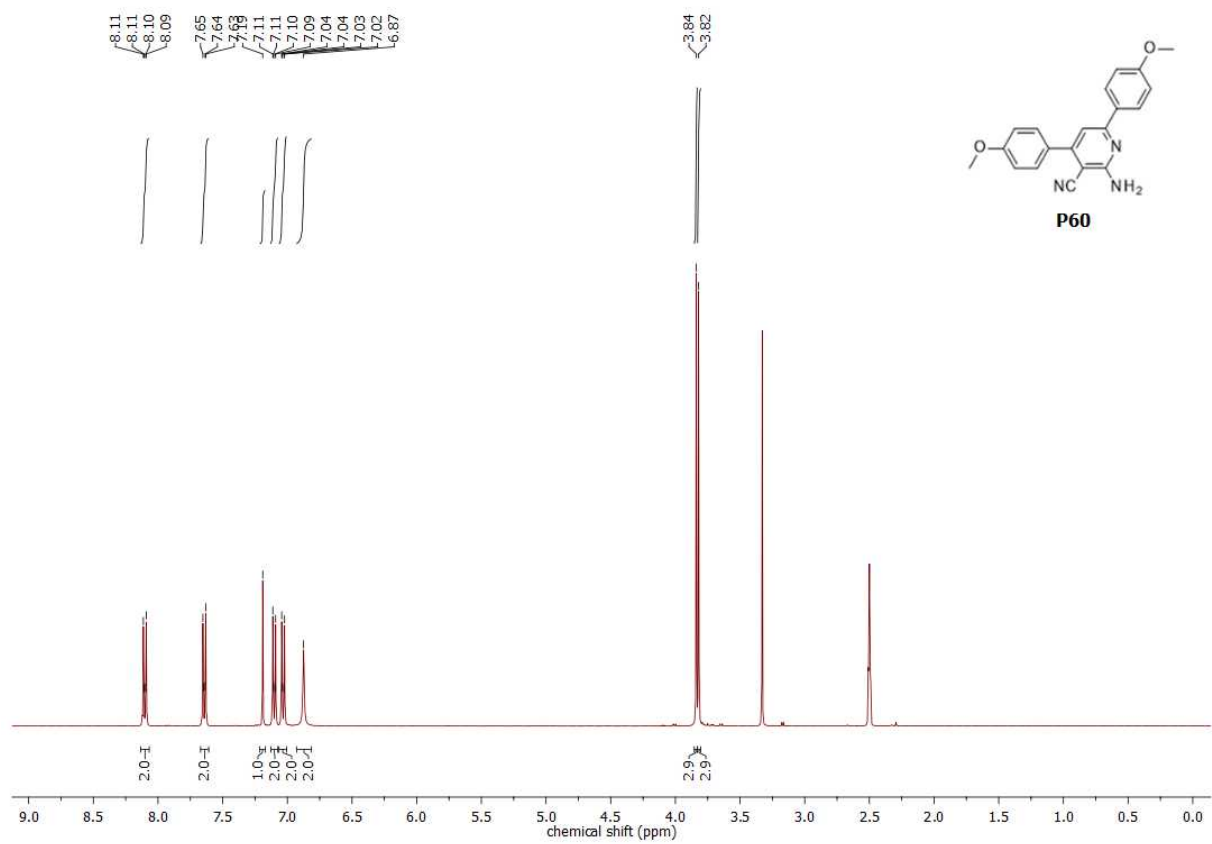

### 3. Materials for photopolymerization processes

#### 3.1. Cationic photopolymerization under UV light with $\lambda_{\max}$ =320 nm and under $\lambda_{\max}$ =365 nm respectively.

3,4-epoxycyclohexylmethyl 3,4-epoxycyclohexanecarboxylate (CADE, from Allnex) as a cycloaliphatic epoxide monomer was used for the compositions cured by ring opening cationic photopolymerization. Triethylene glycol divinyl ether (TEGDVE, from Sigma Aldrich) was applied as a model vinyl ether monomer for cationic chain photopolymerization. For the role of cationic photoinitiator the diphenyliodonium hexafluorophosphate (HIP, from Alfa Aesar) was used under UV light with  $\lambda_{\max}$  =320 nm. The bimolecular photoinitiating systems based on diphenyliodonium hexafluorophosphate (HIP) and 2-amino-4,6-diphenyl-pyridine-3-carbonitrile derivatives were used during the photopolymerization processes under UV light with  $\lambda_{\max}$  =365 nm.

#### 3.2. Free-radical photopolymerization under UV light with $\lambda_{\max}$ =320 nm.

Trimethylopropane triacrylate (TMPTA, from Sigma Aldrich) and 2,2-dimethoxy-2-phenylacetophenone (DMPA, from Sigma Aldrich), were employed as an methacrylate monomer and a free-radical photoinitiator 2,2-dimethoxy-2-phenylacetophenone (DMPA, from Sigma Aldrich) for the compositions polymerized by a free-radical mechanism for FPT experiments under UV light with  $\lambda_{\max}$  =320 nm.

#### 3.3. Free-radical photopolymerization under UV light with $\lambda_{\max}$ =365 nm.

For the compositions polymerized by a free-radical mechanism under UV light with  $\lambda_{\max}$  =365 nm were used trimethylopropane triacrylate (TMPTA, from Sigma Aldrich) as a model acrylate monomer and the bimolecular systems based on diphenyliodonium hexafluorophosphate (HIP) and 2-amino-4,6-diphenyl-pyridine-3-carbonitrile derivatives as photoinitiators.

#### 3.4. Thiol-ene photopolymerization under UV light with $\lambda_{\max}$ =320 nm.

Moreover, trimethylopropane trimethacrylate (TMPTMA, from Sigma Aldrich) and trimethylopropane tris(3-mercaptopropionate) (MERCAPTO, from Sigma Aldrich) were utilized as a methacrylate and thiol monomers for the compositions polymerized by the thiol-ene mechanism. 2,2-dimethoxy-2-phenylacetophenone (DMPA, from Sigma Aldrich) was applied as the photoinitiator in the thiol-ene polymerization process for FPT experiments under UV light with  $\lambda_{\max}$  =320 nm.

#### 3.5. Thiol-ene photopolymerization under UV light with $\lambda_{\max}$ =365 nm.

Respectively, trimethylopropane trimethacrylate (TMPTMA, from Sigma Aldrich) and trimethylopropane tris(3-mercaptopropionate) (MERCAPTO, from Sigma Aldrich) were applied as the monomers for thiol-ene process of photopolymerization. For the role of UV -long wavelength photoinitiators were used diphenyliodonium hexafluorophosphate (HIP) and 2-amino-4,6-diphenyl-pyridine-3-carbonitrile derivatives. Structures of the monomers are shown in Table 1.



Table 1. Chemical structures of the monomers and iodonium salt.

| <b>One component photoinitiators</b>                                               |                                                                                    |                                                                                     |
|------------------------------------------------------------------------------------|------------------------------------------------------------------------------------|-------------------------------------------------------------------------------------|
| 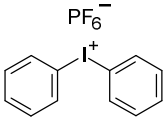  |                                                                                    |  |
| HIP – one component cationic photoinitiator                                        |                                                                                    | DMPA – one component free-radical photoinitiator                                    |
| <b>Monomers</b>                                                                    |                                                                                    |                                                                                     |
|   |   |  |
| CADE                                                                               | TEGDVE                                                                             | TMPTA                                                                               |
|  |  |                                                                                     |
| MERCAPTO                                                                           | TMPTMA                                                                             |                                                                                     |

#### 4. References:

[48] Kambe, S., Saito, K., Sakurai, A., Midorikawa, H., A simple method for the preparation of 2-amino-4-aryl-3-cyanopyridines by condensation of malononitrile with aromatic aldehydes and alkyl ketones in the presence of ammonium acetate, *Synthesis* 1980, 366-368
